# Supplementary material for: One-phase synthesis of small gold nanoparticles coated by a horizontal porphyrin monolayer
Source: Royal Society of Chemistry journal article supplement (doi:10.1039/b815100h), 2008-01-01
Supplement: b815100h.pdf [file b815100h.pdf]

**Electronic supplementary information (ESI)**

**One-Phase Synthesis of Small Gold Nanoparticles Coated by a Horizontal Porphyrin Monolayer**

Junya Ohyama,<sup>a</sup> Yutaka Hitomi,<sup>\*ab</sup> Yasuhiro Higuchi,<sup>a</sup> Masashi Shinagawa,<sup>a</sup> Hidefumi Mukai,<sup>a</sup> Masahito Kodera,<sup>b</sup> Kentaro Teramura,<sup>c</sup> Tetsuya Shishido,<sup>a</sup> Tsunehiro Tanaka<sup>a</sup>

<sup>a</sup> Department of Molecular Engineering, Graduate School of Engineering, Kyoto University, Kyoto 615-8510, Japan. Fax: +81 75 383 2561; Tel: +81 75 383 2562

<sup>b</sup> Department of Molecular Chemistry and Biochemistry, Doshisha University, Kyotanabe, Kyoto 610-0321, Japan. Tel: +81 774 65 7437; E-mail: yhitomi@mail.doshisha.ac.jp

<sup>c</sup> Kyoto University Pioneering Research Unit for Next Generation, Kyoto University, Kyoto 615-8510, Japan.

**General methods.** Electronic absorption spectra were measured on a HITACHI U-3500 UV-VIS-NIR spectrometer by using a quartz cell with a 1-cm path length.  $^1\text{H}$ ,  $^{13}\text{C}$ , 2D (HMQC, HMBC) NMR spectra were measured in  $\text{CDCl}_3$  on a JEOL JNM-ECX400 spectrometer. Transmission electron microscopy (TEM) images were taken with a JEOL JEM-100SX operating at an accelerating voltage of 100 kV. TEM samples were prepared by depositing of drops of a methanol solution onto a carbon-coated copper grid (Okenshoji Co. LTD.) and dried to the solvent at room temperature. X-ray photoelectron spectra (XPS) were acquired using an ULVAC PHI 5500MT. XPS samples were mounted on an indium foil and the spectra were measured using  $\text{Mg } K_{\alpha}$  radiation (15 kV, 400 W) in a chamber with the base pressure of ca.  $1 \times 10^{-8}$  Torr. The take-off angle was set at  $45^\circ$ . All binding energies were corrected for charge shifting by referencing to the C(1s) line from the adventitious carbon at 284.6 eV.

**Materials.** All solvents were purchased from Wako Pure Chemical Industry.

2-Nitrobenzaldehyde, pyrrole, and potassium thioacetate were purchased from Tokyo Chemical Industry, and the other chemicals were from Wako Pure Chemical Industry.

5,10,15,20-Tetrakis(*o*-nitrophenyl)-porphyrin and 5,10,15,20-tetrakis(*o*-aminophenyl)-

porphyrin were synthesized according to the literature,<sup>1</sup> and the latter was atropisomerized to the  $\alpha,\alpha,\alpha,\alpha$ -atropisomer according to the Lindsey's procedure.<sup>2</sup>

**$\alpha,\alpha,\alpha,\alpha$ -5,10,15,20-tetrakis(2-(S-acetyl-thioacetamido)phenyl)porphyrin (1).**

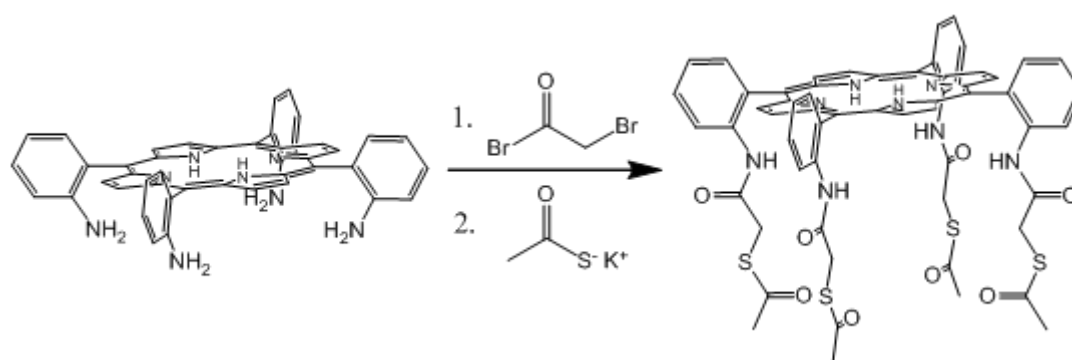

To a solution of  $\alpha,\alpha,\alpha,\alpha$ -5,10,15,20-tetrakis(2-aminophenyl) porphyrin (0.498 g, 0.738 mmol) in dry THF (80 mL) was diethylaniline (1.6 mL, 10.3 mmol) added under  $N_2$ . Bromoacetyl bromide (641  $\mu$ L, 7.34 mmol) in  $CH_2Cl_2$  (11 mL) was added to the mixture dropwise over 5 min at  $0^\circ C$  and stirred for 1 h at  $0^\circ C$ . Then, potassium thioacetate (1.7 g, 14.9 mmol) in dry EtOH (80 mL) was added to the mixture and stirred for 2 h. The solvent was removed under reduced pressure. The residue was purified by column chromatography on silica gel eluted with  $CHCl_3$  and subsequent recrystallization from  $CHCl_3$ -MeOH. 0.240 g (0.211 mmol, 29%). TLC  $R_f$  = 0.62 ( $CHCl_3$ :MeOH 10:1); HRMS-FAB ( $m/z$ ):  $[M+H]^+$  calcd for  $C_{60}H_{50}O_8N_8S_4$ , 1138.26; found, 1138.2642;  $^1H$  NMR ( $CDCl_3$ , 400 MHz):  $\delta$  8.78 (s, 8H,  $H_b$ ), 8.57 (d, 4H,  $H_a$ ), 7.99 (d, 4H,  $H_d$ ), 7.85

(dd, 4H,  $H_c$ ), 7.64 (s, 4H,  $H_e$ ), 7.54 (dd, 4H,  $H_b$ ), 3.56 (s, 8H,  $H_f$ ), 0.75 (s, 12H,  $H_g$ ),  
-2.69 (s, 2H,  $H_i$ );  $^{13}\text{C}$ -NMR ( $\text{CDCl}_3$ , 100 MHz):  $\delta$  194.1 ( $C_i$ ), 165.9 ( $C_g$ ), 138.2 ( $C_e$ ),  
134.6 ( $C_d$ ), 131.8 ( $C_f$ ), 131.4 ( $C_l$ ), 129.9 ( $C_c$ ), 123.6 ( $C_b$ ), 121.8 ( $C_a$ ), 114.8 ( $C_k$ ), 33.2  
( $C_h$ ), 28.7 ( $C_j$ ) ( $C_m$  could not be observed, presumably due to N-H tautomerism<sup>3</sup>;  
UV-Vis  $\lambda_{\text{max}}$  in DMF: 422, 516, 550, 591, 647 nm.

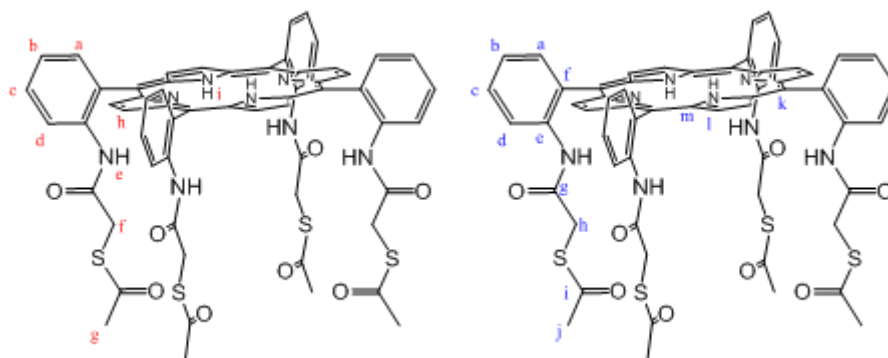

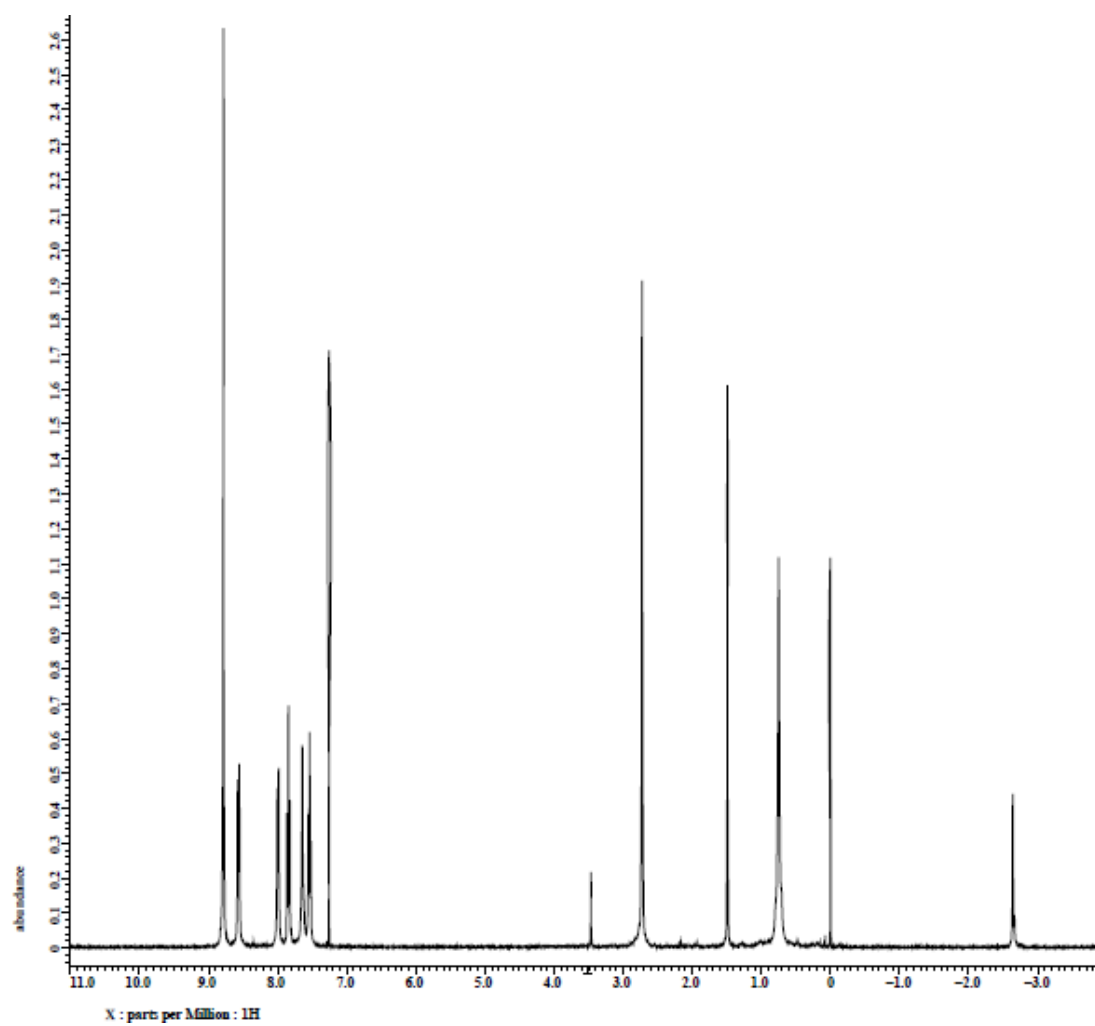

**Fig. S1**  $^1\text{H}$ -NMR chart of **1**.

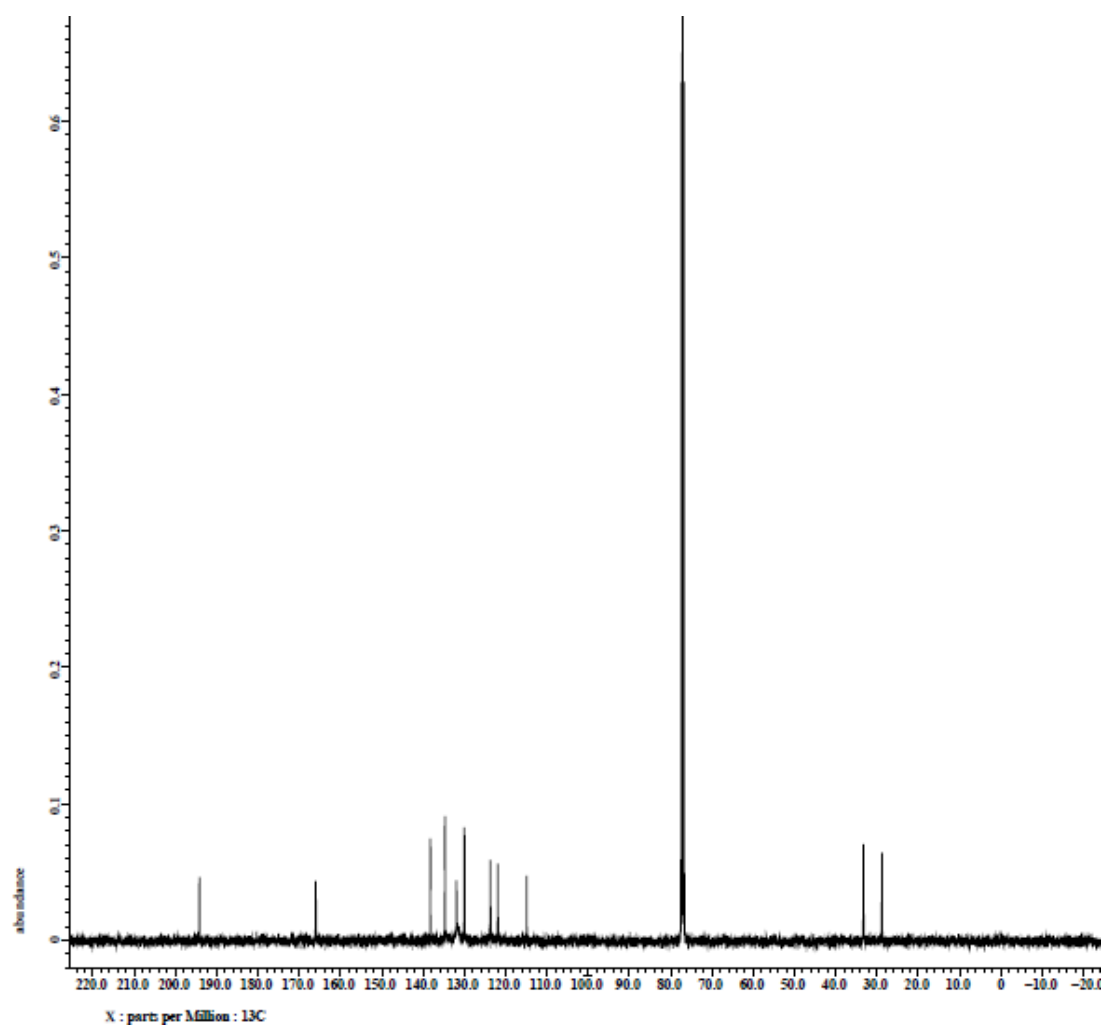

**Fig. S2**  $^{13}\text{C}$ -NMR chart of **1**.

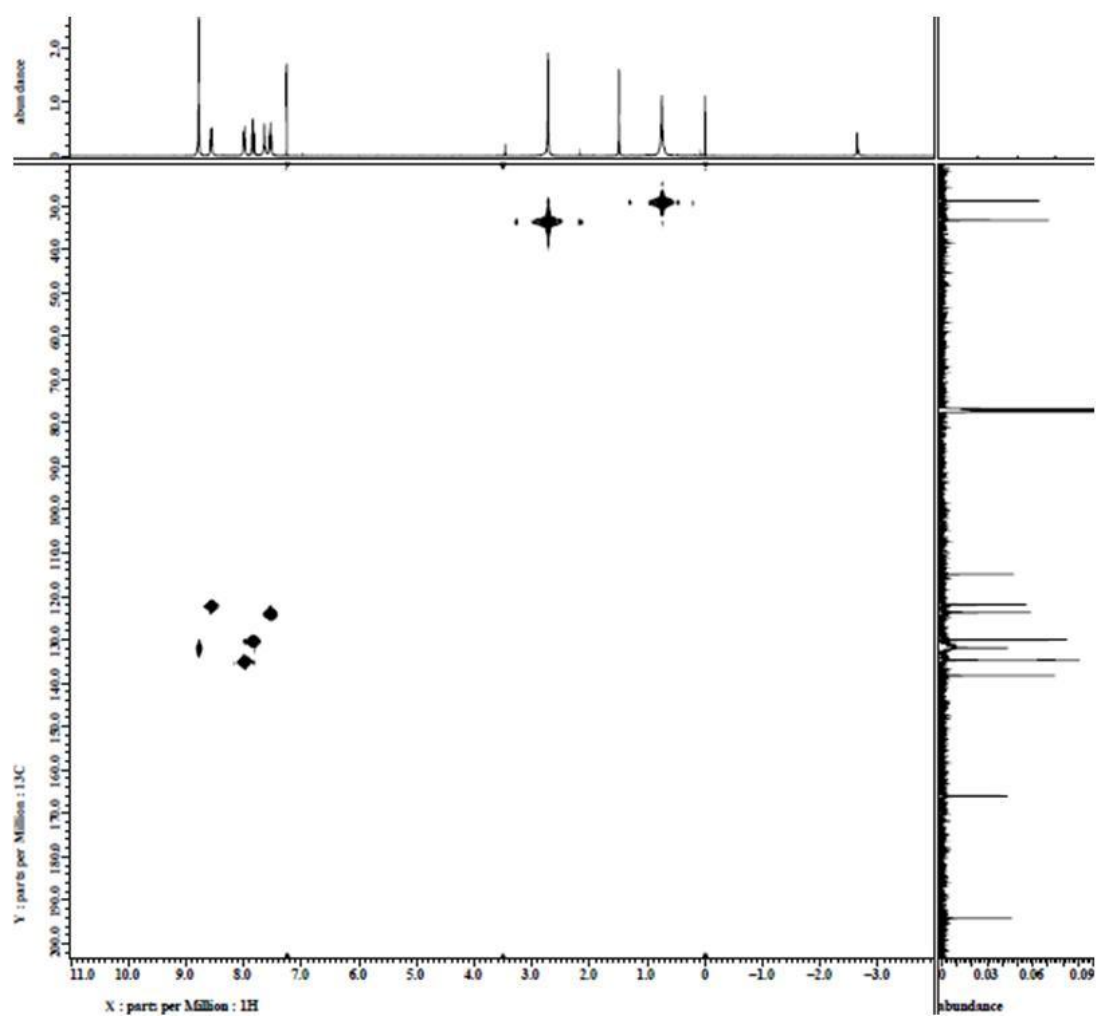

**Fig. S3** HMQC chart of **1**.

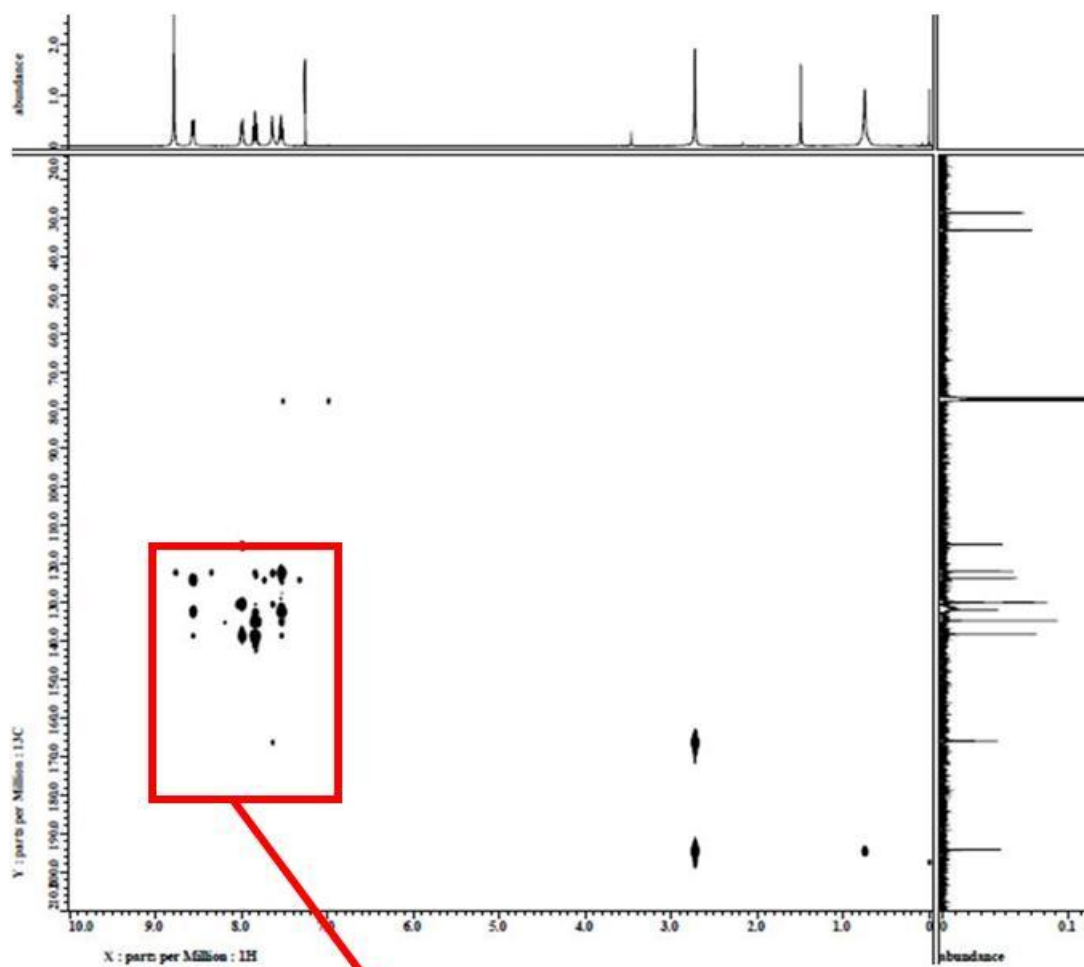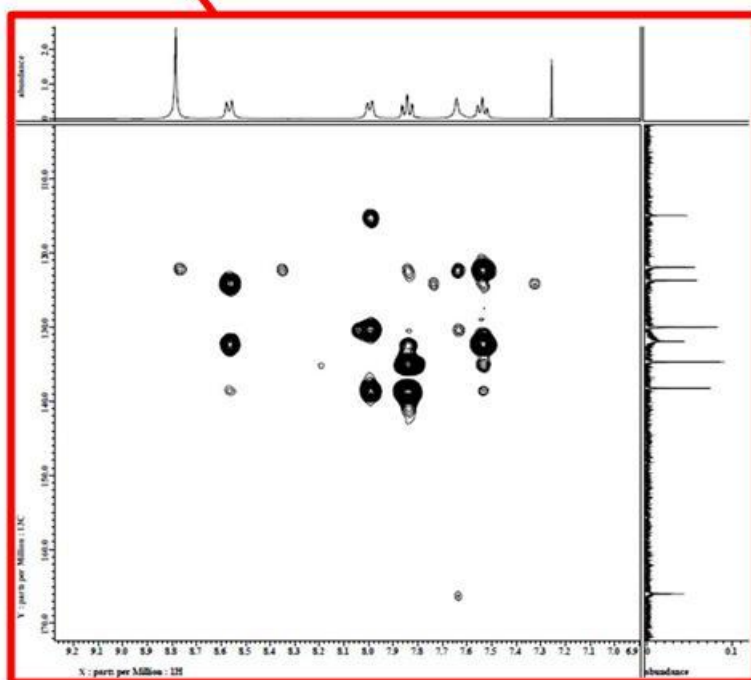

**Fig. S4** HMBC chart of **1**.

**4-(S-Acetyl-thioacetamido)-toluene (2).**

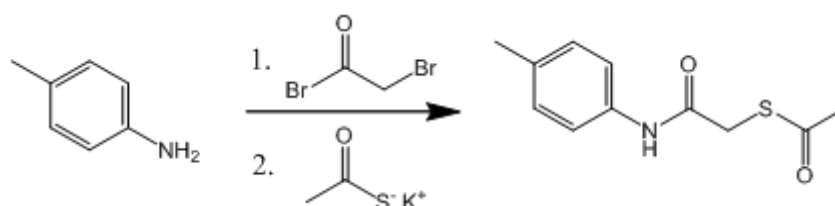

Compound **2** was synthesized by the similar procedure to **1**. *p*-Toluidine (535.8 mg, 5.00 mmol) was reacted with bromoacetyl bromide (1.1 mL, 12.6 mmol) in the presence of diethylaniline (2.5 mL, 15.6 mmol) under N<sub>2</sub> and 0 °C, followed by reaction with potassium thioacetate (2.83 g, 24.8 mmol) under N<sub>2</sub>. The product was purified by column chromatography on silica gel with chloroform and 100:1 chloroform:methanol, and followed by recrystallization from hexane-AcOEt. 0.786 g (3.52 mmol, 70%). TLC *R<sub>f</sub>* = 0.50 (CHCl<sub>3</sub>:MeOH 100:1); <sup>1</sup>H NMR (CDCl<sub>3</sub>, 400 MHz): δ 8.02 (s, 4H, **H<sub>d</sub>**), 7.37 (d, 2H, **H<sub>c</sub>**), 7.12 (d, 2H, **H<sub>b</sub>**), 3.65 (s, 2H, **H<sub>e</sub>**), 2.45 (s, 3H, **H<sub>a</sub>**), 2.31 (s, 3H, **H<sub>f</sub>**). <sup>13</sup>C-NMR (CDCl<sub>3</sub>, 100 MHz): δ 197.0 (**C<sub>h</sub>**), 166.2 (**C<sub>f</sub>**), 135.0 (**C<sub>b</sub>**), 134.2 (**C<sub>e</sub>**), 129.5 (**C<sub>c</sub>**), 120.0 (**C<sub>d</sub>**), 34.2 (**C<sub>g</sub>**), 30.3 (**C<sub>i</sub>**), 20.9 (**C<sub>a</sub>**).

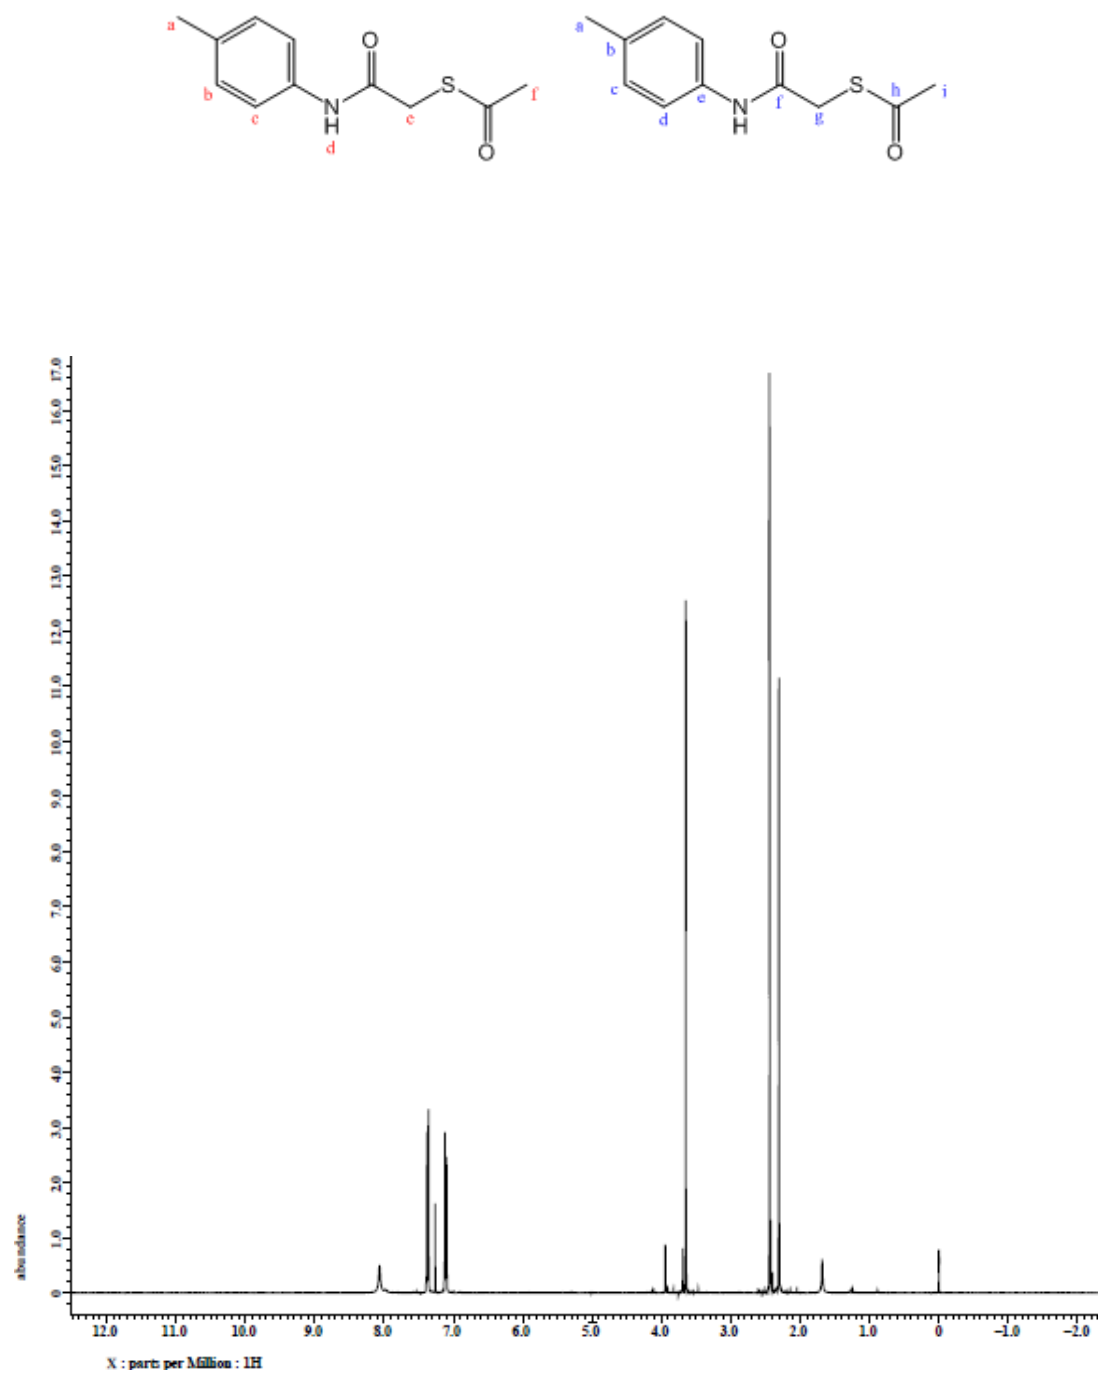

Fig. S5  $^1\text{H}$ -NMR chart of 2.

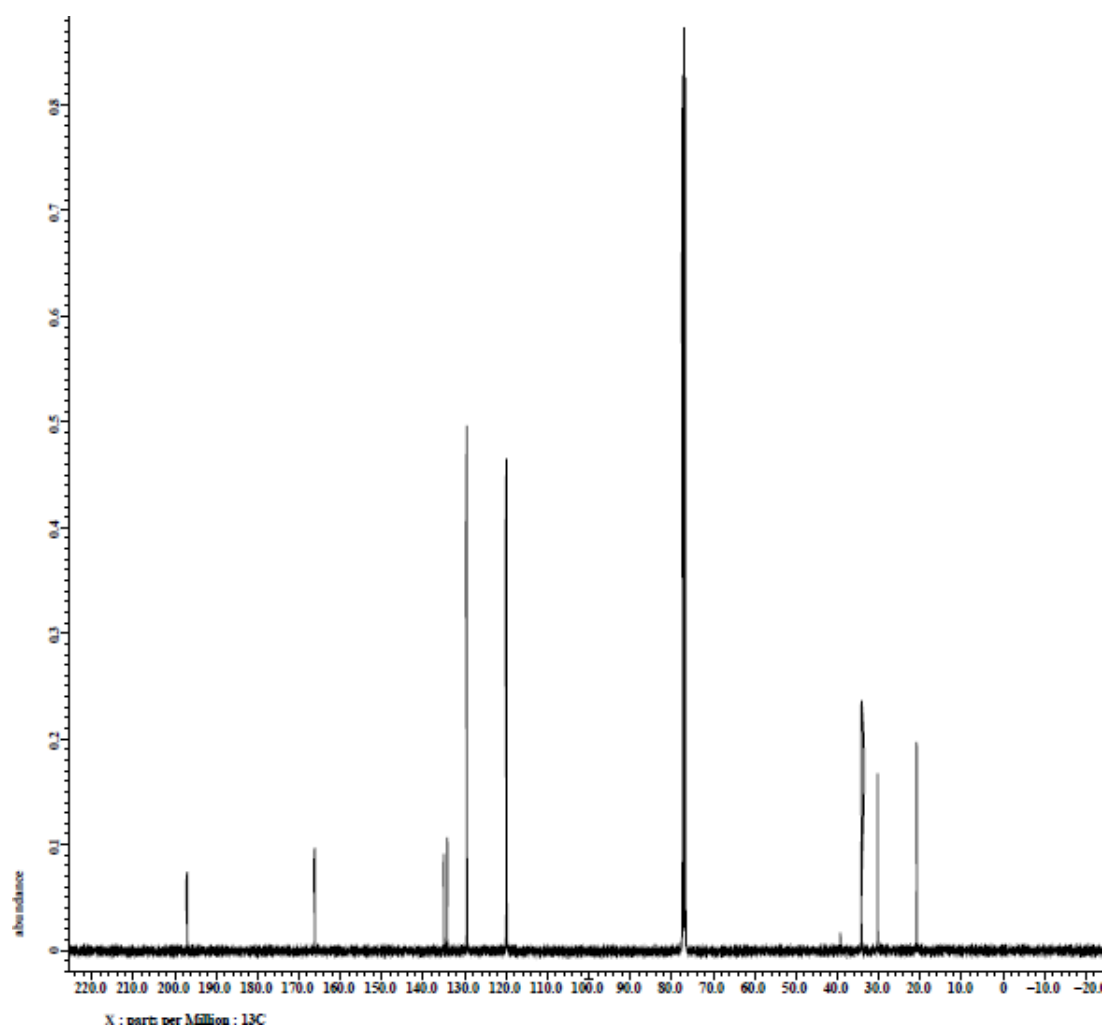

**Fig. S6**  $^{13}\text{C}$ -NMR chart of **2**.

**Gold nanoparticles covered with **1** (GN@1).**

A solution of **1** (11.4 mg, 10.0  $\mu\text{mol}$ ) in DMF (180 mL) was added to a 300 mL round-bottom flask which was cleaned with piranha solution. 40.0  $\mu\text{M}$   $\text{HAuCl}_4$  solution in DMF (2 mL) was added and the mixture was reduced with  $\text{NaBH}_4$  (18.25 mg, 772

$\mu\text{mol}$ ) dissolved in DMF. After 2 hour stirring, the reaction mixture was evaporated to ca. 3 mL and precipitated by 30 mL of methanol to remove excess amount of **1** and  $\text{NaBH}_4$ . The precipitate was dissolved in 2 mL of DMF and reprecipitated by 30 mL of  $\text{CHCl}_3$ . The reprecipitation process was repeated five times. Purified **GN@1** was characterized by TEM, UV-vis and XPS measurements.

**Size controlled synthesis of gold nanoparticles.** Gold nanoparticles were synthesized in the presence of **1**, **2**, and dodecanethiol under various molar ratios ( $\text{S/Au} = 0, 0.1, 0.2, 1, 4$  and  $16$ ). All of glass vials for the syntheses of gold nanoparticles were cleaned with piranha solution. A typical method is as follows; 8 mL of 1.01 mM **1** solution of DMF ( $8.08 \mu\text{mol}$ ),  $93.5 \mu\text{L}$  of 21.4 mM hydrogen tetrachloroaurate trihydrate solution of DMF ( $2.00 \mu\text{mol}$ ) and 1.8 mL of DMF were added to a reaction vessel. While the mixture was vigorously stirring,  $100 \mu\text{L}$  of 0.248 M sodium borohydride ( $24.8 \text{ mmol}$ ) was swiftly added and then stirred for 1 hour. The solutions were evaporated and the residue was dispersed in MeOH. All samples were observed by TEM without purification.

(a) Thioacetyl group/  $\text{HAuCl}_4 = 16$

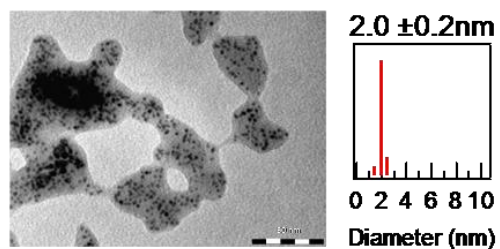

(b) Thioacetyl group/  $\text{HAuCl}_4 = 4$

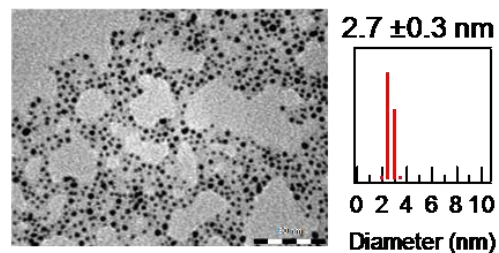

(c) Thioacetyl group/  $\text{HAuCl}_4 = 1$

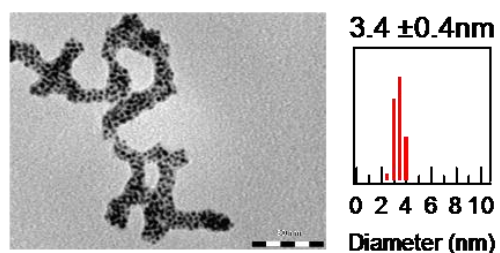

(d) Thioacetyl group/  $\text{HAuCl}_4 = 0.2$

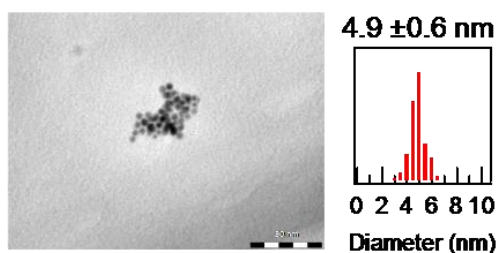

(e) Thioacetyl group/  $\text{HAuCl}_4 = 0.1$

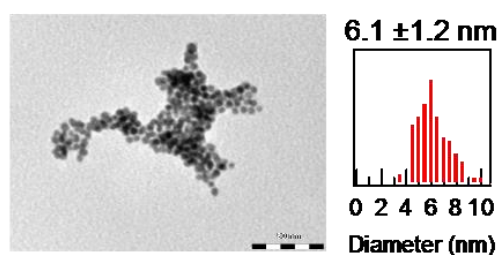

**Fig. S7** TEM images and size distributions of as-synthesized **GN@1** synthesized at various values of  $\xi$ .

(a) Thioacetyl group/  $\text{HAuCl}_4 = 16$

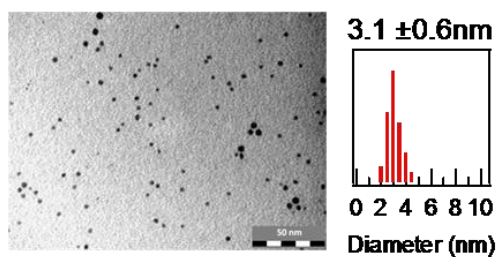

(b) Thioacetyl group/  $\text{HAuCl}_4 = 4$

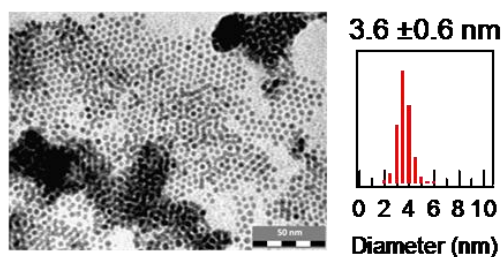

(c) Thioacetyl group/  $\text{HAuCl}_4 = 1$

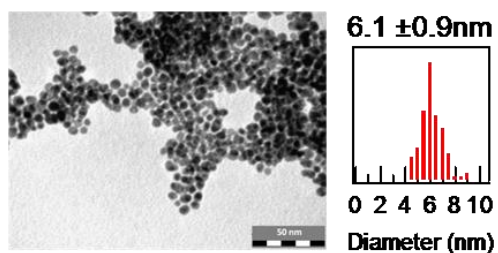

(d) Thioacetyl group/  $\text{HAuCl}_4 = 0.2$

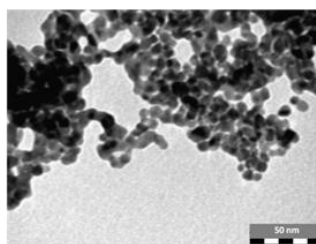

(e) Thioacetyl group/  $\text{HAuCl}_4 = 0.1$

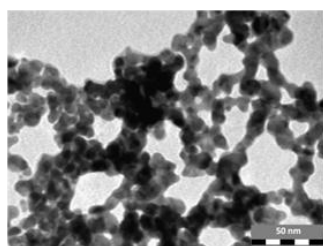

**Fig. S8** TEM images and size distributions of as-synthesized **GN@2** synthesized at various values of  $\xi$ . The TEM images of (d) and (e) didn't show particle boundaries because of aggregation of particles.

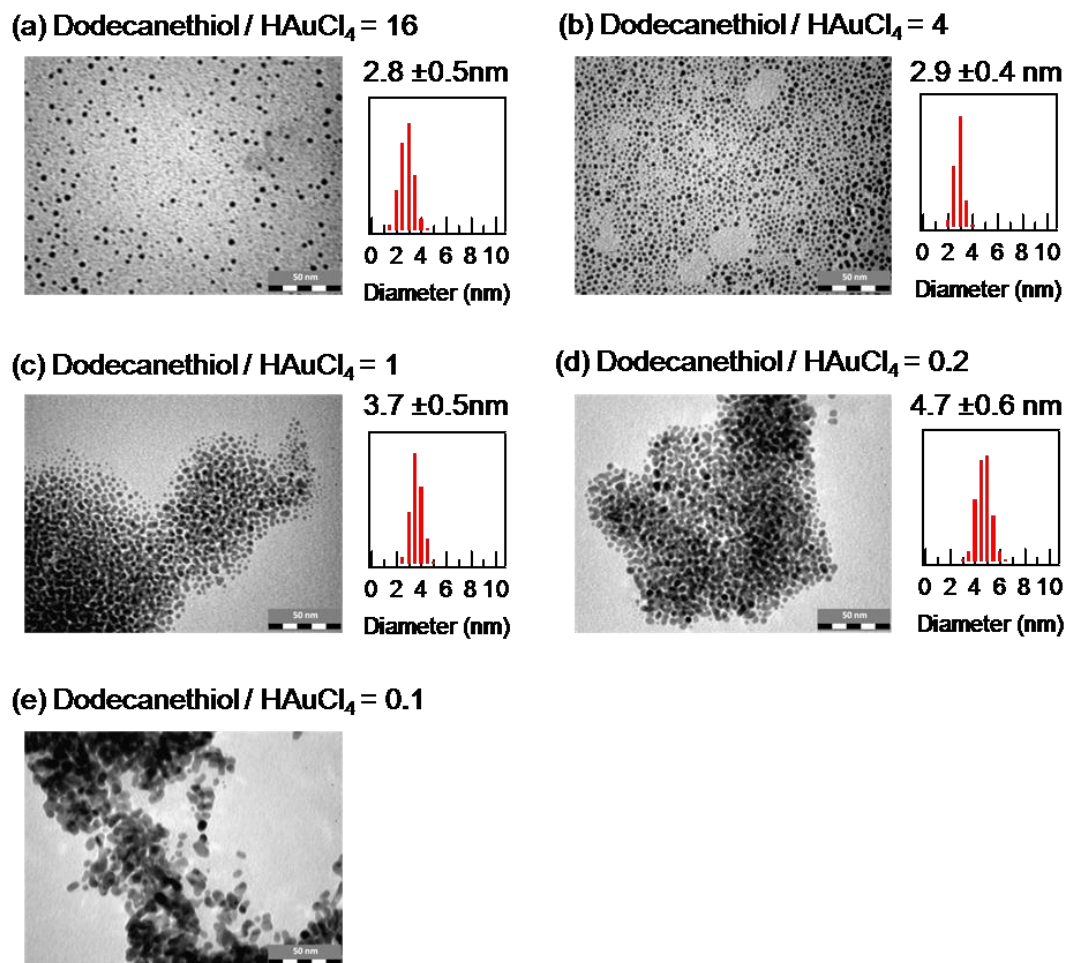

**Fig. S9** TEM images and size distributions of as-synthesized gold nanoparticles covered with dodecanethiol synthesized at various values of  $\xi$ . The TEM image of (e) didn't show particle boundaries because of aggregation of particles.

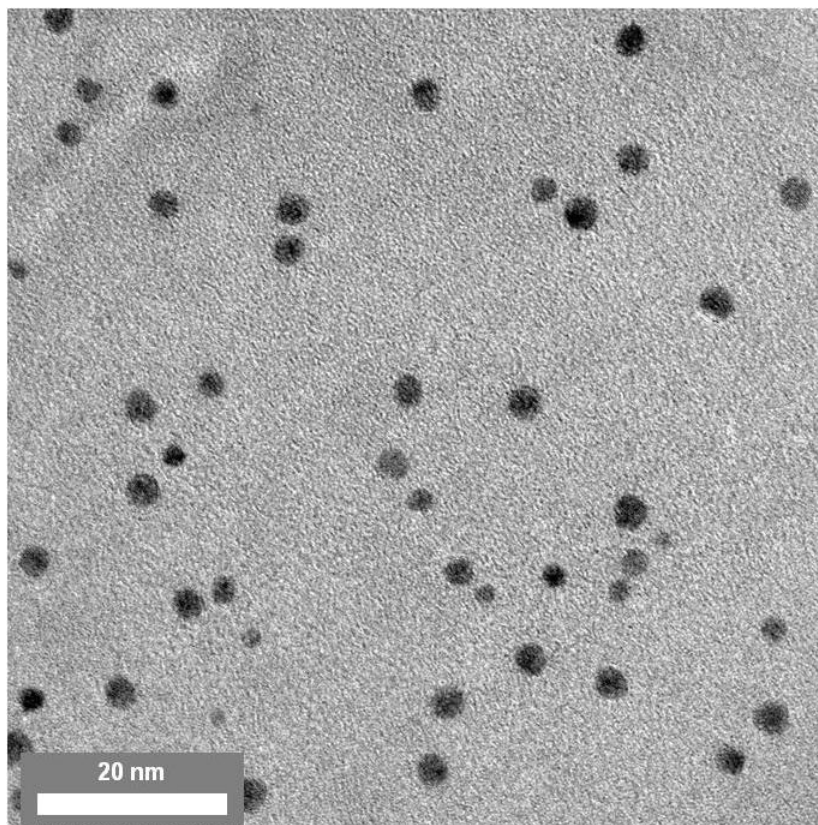

**Fig. S10** TEM image of GN@1. The scale bar corresponds to 20 nm.

### ***References***

1. J. P. Collman, R. R. Gagne, C. Reed, T. R. Halbert, G. Lang and W. T. Robinson, *J. Am. Chem. Soc.*, 1975, **97**, 1427.
2. J. Lindsey, *J. Org. Chem.*, 1980, **45**, 5215.
3. R. J. Abraham, G. E. Hawkes, M. F. Hudson and K. M. Smith, *J. Chem. Soc. -Perkin Trans. 2*, 1975, 204.
